# Supplementary material
Source: PubMed Central journal article supplement (PMC3596045)
Supplement: NIHMS438379-supplement-1.pdf [file NIHMS438379-supplement-1.pdf]

**Supplementary Table 1. Demographic and clinical characteristics of the study cohort.**

| Characteristic                                       | ALL<br>n=88  | Normal<br>n=20<br>(22.73%) | Endo<br>n=33<br>(37.50%) | SOC<br>n=21<br>(23.86%) | EAOCA <sup>a</sup><br>n=14<br>(15.91%) | p-value <sup>b</sup> |
|------------------------------------------------------|--------------|----------------------------|--------------------------|-------------------------|----------------------------------------|----------------------|
| <b>Age at presentation (year), mean(SD)</b>          | 46.84(17.41) | 38.75(14.11)               | 36.24(10.20)             | 65.52(12.46)            | 55.36(14.61)                           | <b>&lt;0.0001</b>    |
| <b>Gravidity, median (IQR)<sup>b</sup></b>           | 1(0,3)       | NA <sup>d</sup>            | 0(0,1)                   | 2.5(1,3)                | 0.5(0,2)                               | <b>0.0092</b>        |
| <b>Parity, median (IQR)<sup>c</sup></b>              | 1(0,2)       | NA                         | 0(0,1)                   | 2.5(1,3)                | 0.5(0,2)                               | <b>0.0071</b>        |
| <b>Body mass index (kg/m<sup>2</sup>), mean(SD)</b>  | 26.27(5.36)  | NA                         | 26.27(5.09)              | 24.94(5.43)             | 27.92(5.85)                            | 0.4417               |
| <b>Race (White), n (%)</b>                           | 73(83.91)    | 9(45.00)                   | 30(90.91)                | 20(100.00)              | 14(100.00)                             | <b>&lt;0.0001</b>    |
| <b>History of tobacco use, n (%)</b>                 | 19(29.23)    | NA                         | 9(29.03)                 | 7(35.00)                | 3(21.43)                               | 0.7240               |
| <b>History of alcohol use, n (%)</b>                 | 31(48.44)    | NA                         | 17(54.84)                | 7(35.00)                | 7(53.85)                               | 0.6835               |
| <b>History of endometriosis, n (%)</b>               | 19(65.22)    | NA                         | 17(68.00)                | 0(0)                    | 2(66.67)                               | 0.7186               |
| <b>History of oral contraceptive pill use, n (%)</b> | 26(81.25)    | NA                         | 21(84.00)                | 2(66.67)                | 3(75.00)                               | 0.5445               |
| <b>Postmenopausal, n (%)</b>                         | 21(34.43)    | NA                         | 2(6.45)                  | 12(70.59)               | 7(53.85)                               | <b>0.0002</b>        |
| <b>Family history of cancer, n (%)</b>               | 28(45.16)    | NA                         | 11(37.93)                | 11(55.00)               | 6(46.15)                               | 0.4710               |
| <b>Stage of disease, n (%)</b>                       |              | NA                         | NA                       |                         |                                        |                      |
| <b>Early</b>                                         | 11(31.43)    |                            |                          | 3(14.29)                | 8(57.14)                               | <b>0.0084</b>        |
| <b>Late stage</b>                                    | 24(68.57)    |                            |                          | 18(85.71)               | 6(42.86)                               |                      |

<sup>a</sup> EAOCA group comprises n=6 endometrioid (50%), n=7 clear cell tumors (48.2%) and n=1 (7.1%) mixed histology of clear cell/endometrioid type

<sup>b</sup> ANOVA or Kruskal-Wallis test for continuous variables; Chi-square test or Cochran-Mantel-Haenszel Chi-square test for categorical variables

<sup>c</sup> IQR, Interquartile Range (25<sup>th</sup> percentile, 75<sup>th</sup> percentile)

<sup>d</sup> NA, not available

**Supplementary Table 2. List of the 24 miRNAs identified by genome-wide plasma miRNA expression profiling from healthy controls (n=6), endometriosis patients (n=7), and EAOc patients (n=7).**

|              |              |              |               |              |                |                |              |
|--------------|--------------|--------------|---------------|--------------|----------------|----------------|--------------|
| hsa-miR-1978 | hsa-miR-1974 | hsa-miR-1977 | hsa-miR-16    | hsa-miR-1973 | hsa-miR-195    | hsa-miR-191    | hsa-miR-652  |
| hsa-miR-1308 | hsa-miR-1975 | hsa-miR-15b  | hsa-miR-1979  | hsa-miR-21   | hsa-miR-766    | hsa-miR-628-3p | hsa-miR-4313 |
| hsa-miR-1246 | hsa-miR-376a | hsa-miR-744  | hsa-miR-1274a | hsa-miR-1915 | hsa-miR-362-5p | hsa-miR-4284   | hsa-miR-132  |

**Supplementary Table 3. The 10 most differentially expressed miRNAs in pair-wise comparisons between SOC patients and healthy controls, endometriosis, or EAOC samples.**

| <b>SOC (n =21) vs<br/>Healthy (n = 20)</b> | <b>W.pvalue</b> | <b>a.W.pvalue</b> | <b>FC</b> |
|--------------------------------------------|-----------------|-------------------|-----------|
| hsa-miR-4284                               | 0.00028         | 0.00504           | 6.96      |
| hsa-miR-1974                               | 0.00086         | 0.00774           | 8.56      |
| hsa-miR-16                                 | 0.00243         | 0.01458           | 4.56      |
| hsa-miR-1977                               | 0.00393         | 0.01769           | 2.49      |
| hsa-miR-1975                               | 0.00728         | 0.02621           | 0.39      |
| hsa-miR-195                                | 0.02323         | 0.06037           | 2.64      |
| hsa-miR-1978                               | 0.02521         | 0.06037           | 2.59      |
| hsa-miR-21                                 | 0.02683         | 0.06037           | 2.08      |
| hsa-miR-362-5p                             | 0.03142         | 0.06284           | 1.76      |
| hsa-miR-15b                                | 0.04500         | 0.07747           | 2.31      |

| <b>SOC (n =21) vs<br/>Endo (n = 33)</b> | <b>W.pvalue</b> | <b>a.W.pvalue</b> | <b>FC</b> |
|-----------------------------------------|-----------------|-------------------|-----------|
| hsa-miR-15b                             | 0.00923         | 0.08226           | 0.23      |
| hsa-miR-191                             | 0.01005         | 0.08226           | 0.27      |
| hsa-miR-1973                            | 0.01743         | 0.08226           | 0.48      |
| hsa-miR-362-5p                          | 0.01828         | 0.08226           | 0.52      |
| hsa-miR-16                              | 0.06761         | 0.22134           | 0.25      |
| hsa-miR-21                              | 0.07378         | 0.22134           | 0.25      |
| hsa-miR-195                             | 0.10272         | 0.26414           | 0.31      |
| hsa-miR-1308                            | 0.23086         | 0.51146           | 0.49      |
| hsa-miR-1974                            | 0.25573         | 0.51146           | 0.59      |
| hsa-miR-652                             | 0.30405         | 0.54729           | 0.56      |

| <b>SOC (n = 21) vs<br/>EAOC (n = 14)</b> | <b>W.pvalue</b> | <b>a.W.pvalue</b> | <b>FC</b> |
|------------------------------------------|-----------------|-------------------|-----------|
| hsa-miR-21                               | 0.00006         | 0.00102           | 0.06      |
| hsa-miR-16                               | 0.00014         | 0.0011            | 0.05      |
| hsa-miR-191                              | 0.00021         | 0.0011            | 0.12      |
| hsa-miR-15b                              | 0.00026         | 0.0011            | 0.13      |
| hsa-miR-1975                             | 0.00126         | 0.00428           | 0.23      |
| hsa-miR-1246                             | 0.00259         | 0.00734           | 0.33      |
| hsa-miR-362-5p                           | 0.00399         | 0.0088            | 3.71      |
| hsa-miR-1979                             | 0.00414         | 0.0088            | 0.23      |
| hsa-miR-1973                             | 0.01101         | 0.02011           | 0.29      |
| hsa-miR-195                              | 0.01183         | 0.02011           | 0.24      |
